# Supplementary material
Source: HighWire-hosted journal article supplement (https://bmjopen.bmj.com/content/13/2/e066324)
Supplement: inline-supplementary-material-1 [file inline-supplementary-material-1.pdf]

## Full Search Strategy

### PUBMED

**The advanced search will be performed on the pubmed platform. In the first step, synonymous terms will be entered for exposure and separately for each outcome using the Boolean operators OR and performed the search for isolated variables.**

- #1 (Childbearing age) OR (Reproductive Age) OR (Age, Reproductive)
- #2 (Copper) OR (Copper status)
- #3 (Selenium) OR (Selenium status)
- #4 (Zinc) OR (Zinc status)

**The search will be performed using the Boolean operator AND between the independent and dependent variables. No filter will be used to perform the search.**

(Childbearing age) OR (Reproductive Age) OR (Age, Reproductive) AND (Copper) OR (Copper status)  
(Childbearing age) OR (Reproductive Age) OR (Age, Reproductive) AND (Selenium) OR (Selenium status)  
(Childbearing age) OR (Reproductive Age) OR (Age, Reproductive) AND (Zinc) OR (Zinc status)

### SCIENCE DIRECT

childbearing or reproductive age or age, reproductive AND ZINC  
childbearing or reproductive age or age, reproductive AND COPPER  
childbearing or reproductive age or age, reproductive AND SELENIUM

### LILACS - By BVS filter

(women OR women's health) AND zinc  
(women OR women's health) AND copper  
(women OR women's health) AND selenium

### ADOLEc - By BVS filter

(women OR women's health) AND zinc  
(women OR women's health) AND copper  
(women OR women's health) AND selenium

### SCOPUS

- #1 "Childbearing age" OR "Reproductive Age" OR "Age, Reproductive"
- #2 "Copper" OR "Copper status"
- #3 "Selenium" OR "Selenium status"
- #4 "Zinc" OR "Zinc status"

"Childbearing age" OR "Reproductive Age" OR "Age, Reproductive" AND "Copper" OR "Copper status"

“Childbearing age” OR “Reproductive Age” OR “Age, Reproductive” AND “Selenium” OR “Selenium status”

“Childbearing age” OR “Reproductive Age” OR “Age, Reproductive” AND “Zinc” OR “Zinc status”

#### EMBASE

#1 'childbearing age'/exp OR 'childbearing age' OR (('childbearing'/exp OR childbearing) AND ('age'/exp OR age))

#2 'reproductive age'/exp OR 'reproductive age'

#3 'copper'/exp OR copper

#4 'copper status' OR (('copper'/exp OR copper) AND status)

#5 'selenium'/exp OR selenium

#6 'selenium status' OR (('selenium'/exp OR selenium) AND status)

#7 'zinc'/exp OR zinc

#8 'zinc status' OR (('zinc'/exp OR zinc) AND status)

#### #9 - combination #1 OR #2

('childbearing age'/exp OR 'childbearing age' OR (('childbearing'/exp OR childbearing) AND ('age'/exp OR age))) OR ('reproductive age'/exp OR 'reproductive age')

#### #10 – combination #3 OR #4

('copper'/exp OR copper) OR ('copper status' OR (('copper'/exp OR copper) AND status))

#### #11 – combination #5 OR #6

('selenium'/exp OR selenium) OR ('selenium status' OR (('selenium'/exp OR selenium) AND status))

#### #12 – combination #7 OR #8

('zinc'/exp OR zinc) OR ('zinc status' OR (('zinc'/exp OR zinc) AND status))

#### #13 – combination #9 OR #10

((('childbearing age'/exp OR 'childbearing age' OR (('childbearing'/exp OR childbearing) AND ('age'/exp OR age))) OR ('reproductive age'/exp OR 'reproductive age')) OR (('copper'/exp OR copper) OR ('copper status' OR (('copper'/exp OR copper) AND status)))

#### #14 – combination #9 OR #11

((('childbearing age'/exp OR 'childbearing age' OR (('childbearing'/exp OR childbearing) AND ('age'/exp OR age))) OR ('reproductive age'/exp OR 'reproductive age')) OR (('selenium'/exp OR selenium) OR ('selenium status' OR (('selenium'/exp OR selenium) AND status)))

#### #15 - combination #9 OR #12

((('childbearing age'/exp OR 'childbearing age' OR (('childbearing'/exp OR childbearing) AND ('age'/exp OR age))) OR ('reproductive age'/exp OR 'reproductive age')) OR (('zinc'/exp OR zinc) OR ('zinc status' OR (('zinc'/exp OR zinc) AND status)))

**CINAHL**

#1 (Childbearing age) OR (Reproductive Age) OR (Age, Reproductive)

#2 (Copper) OR (Copper status)

#3 (Selenium) OR (Selenium status)

#4 (Zinc) OR (Zinc status)

(Childbearing age) OR (Reproductive Age) OR (Age, Reproductive) AND (Copper) OR (Copper status)

(Childbearing age) OR (Reproductive Age) OR (Age, Reproductive) AND (Selenium) OR (Selenium status)

(Childbearing age) OR (Reproductive Age) OR (Age, Reproductive) AND (Zinc) OR (Zinc status)

**WEB OF SCIENCE**

# 1 TS= ((Childbearing age) OR (Reproductive Age) OR (Age, Reproductive))

#2 TS= ((Copper) OR (Copper status))

#3 TS= ((Selenium) OR (Selenium status))

#4 TS= ((Zinc) OR (Zinc status))

((Childbearing age) OR (Reproductive Age) OR (Age, Reproductive)) AND ((Copper) OR (Copper status))

((Childbearing age) OR (Reproductive Age) OR (Age, Reproductive)) AND ((Selenium) OR (Selenium status))

((Childbearing age) OR (Reproductive Age) OR (Age, Reproductive)) AND ((Zinc) OR (Zinc status))

**COCHRANE LIBRARY**

#1 (Childbearing age) OR (Reproductive Age) OR (Age, Reproductive)

#2 (Copper) OR (Copper status)

#3 (Selenium) OR (Selenium status)

#4 (Zinc) OR (Zinc status)

(Childbearing age) OR (Reproductive Age) OR (Age, Reproductive) AND (Copper) OR (Copper status)

(Childbearing age) OR (Reproductive Age) OR (Age, Reproductive) AND (Selenium) OR (Selenium status)

(Childbearing age) OR (Reproductive Age) OR (Age, Reproductive) AND (Zinc) OR (Zinc status)

**OPEN GREY**

"childbearing" and copper

"childbearing" and zinc

"childbearing" and selenium

"reproductive age" and copper

"reproductive age" and zinc  
"reproductive age" and selenium  
"age, reproductive" and copper  
"age, reproductive" and zinc  
"age, reproductive" and selenium

**IMSEAR - Index Medicus for the South-East Asia Region - By BVS filter**

(women OR women's health) AND zinc  
(women OR women's health) AND copper  
(women OR women's health) AND selenium

**PAHOS IRIS - Pan American Health Organization - By BVS filter**

(women OR women's health) AND zinc  
(women OR women's health) AND copper  
(women OR women's health) AND selenium

**WPRIM - Index Medicus for the Western Pacific - By BVS filter**

(women OR women's health) AND zinc  
(women OR women's health) AND copper  
(women OR women's health) AND selenium

**IMEMR - Index Medicus of the Eastern Mediterranean - By BVS filter**

(women OR women's health) AND zinc  
(women OR women's health) AND copper  
(women OR women's health) AND selenium

**BDTD - THESES AND DISSERTATIONS CATALOG - access through the CAPES platform**

"women" OR women's health AND "zinc"  
"women" OR women's health AND "copper"  
"women" OR women's health AND "selenium"

**No filter was used on any platform.**
